# Supplementary material for: Preliminary Results of NGS Gene Panel Test Using NSCLC Sputum Cytology and Therapeutic Effect Using Corresponding Molecular-Targeted Drugs
Source: MDPI journal article supplement (doi:10.3390/genes13050812), 2022-05-02
Supplement: s1 [file s1]

## Supplementary Materials

Table S1. Sequencing read depth and QC metrics of NGS result.

|            |                 | Fastq quality | Amplification Bias<br>(coefficient of variation<br>of module1 depths) | average amplicon depths of DNA module1 region |            |            |            |            |
|------------|-----------------|---------------|-----------------------------------------------------------------------|-----------------------------------------------|------------|------------|------------|------------|
| Identifier | SampleName      | Q30_fastq     | CV_module1                                                            | BRAF_e151_                                    | KRAS_e021_ | EGFR_e191_ | EGFR_e201_ | EGFR_e211_ |
| SM-135     | Case1_Sputum    | 99.62         | 0.117                                                                 | 12462.9                                       | 15433.3    | 13561.6    | 14771.7    | 16933.2    |
| SM-136     | Case1_TBB brush | 99.64         | 0.088                                                                 | 12968.7                                       | 15304.7    | 13923.5    | 15905.6    | 15878.8    |
| SM-226     | Case2_Sputum    | 99.64         | 0.153                                                                 | 18488.5                                       | 27773.6    | 25230      | 21684      | 22391.5    |
| SM-227     | Case2_TBB brush | 99.53         | 0.161                                                                 | 18761.9                                       | 27684.7    | 21526.4    | 24527.8    | 27511.4    |
| SM-261     | Case3_Sputum    | 99.66         | 0.1                                                                   | 7827.6                                        | 9802.8     | 7902.6     | 8503.8     | 9292.9     |
| SM-262     | Case3_TBB brush | 99.73         | 0.14                                                                  | 6224.5                                        | 8936.8     | 8114.5     | 6857.7     | 7800.9     |

|            |                 | Amplification Bias<br>(coefficient of variation<br>of module2 | average amplicon depths of DNA module1 region |                      |                      |                      |                      |                      |                    |                    |
|------------|-----------------|---------------------------------------------------------------|-----------------------------------------------|----------------------|----------------------|----------------------|----------------------|----------------------|--------------------|--------------------|
| Identifier | SampleName      | CV_module2                                                    | EGFR_e181_<br>depth                           | EGFR_e202_<br>_depth | EGFR_e212_<br>_depth | ERBB2_e08<br>1_depth | ERBB2_e17<br>1_depth | ERBB2_e20<br>1_depth | MET_e141_<br>depth | MET_e142_<br>depth |
| SM-135     | Case1_Sputum    | 0.381                                                         | 2816                                          | 6783.8               | 2873                 | 5821.8               | 6703                 | 8386.5               | 9420               | 7576               |
| SM-136     | Case1_TBB brush | 0.576                                                         | 3205                                          | 7858.9               | 2946                 | 5682                 | 10930.9              | 10656.7              | 6135               | 1510               |
| SM-226     | Case2_Sputum    | 0.48                                                          | 8742.9                                        | 12908.9              | 10835.8              | 12462.9              | 19512.8              | 20088.3              | 31411.5            | 10251              |
| SM-227     | Case2_TBB brush | 0.345                                                         | 8796.9                                        | 12884.7              | 12119.9              | 14665.9              | 16476.7              | 15136.2              | 27004.4            | 18336.7            |
| SM-261     | Case3_Sputum    | 0.31                                                          | 3763.9                                        | 7051.9               | 7872.9               | 5901.6               | 10386.8              | 10044.6              | 11236.9            | 9577.9             |
| SM-262     | Case3_TBB brush | 0.529                                                         | 3849                                          | 5545                 | 4569.9               | 4254                 | 6543.9               | 5484.5               | 13069.8            | 3425               |
